# Supplementary material
Source: Research Square preprint supplement (doi:10.21203/rs.3.rs-8961310/v1)
Supplement: Supplementary file 1 [file 6370ad613337370b805db282.docx]

**Table 5: stratified multivariable logistics regression Showing Independent Predictors of Non-Retention**

| **Variables in the Equation** | | | | | | | | | | |
| --- | --- | --- | --- | --- | --- | --- | --- | --- | --- | --- |
| Sex1 | | | B | S.E. | Wald | df | Sig. | Exp(B) | 95% C.I.for EXP(B) | |
| Lower | Upper |
| Male | Step 1a | MMD1 |  |  | 39.194 | 2 | <.001 |  |  |  |
| MMD1(1) | -21.870 | 11413.939 | .000 | 1 | .998 | .000 | .000 | . |
| MMD1(2) | -2.614 | .418 | 39.194 | 1 | <.001 | .073 | .032 | .166 |
| Year of ART Initiation(1) | 1.137 | .367 | 9.610 | 1 | .002 | 3.116 | 1.519 | 6.393 |
| Reg_Sta1 | -.056 | .099 | .320 | 1 | .572 | .945 | .778 | 1.148 |
| Female | Step 1a | MMD1 |  |  | 25.306 | 2 | <.001 |  |  |  |
| MMD1(1) | -21.308 | 13226.508 | .000 | 1 | .999 | .000 | .000 | . |
| MMD1(2) | -2.117 | .421 | 25.306 | 1 | <.001 | .120 | .053 | .275 |
| Year of ART Initiation(1) | .961 | .347 | 7.649 | 1 | .006 | 2.613 | 1.323 | 5.162 |
| Reg_Sta1 | -.195 | .101 | 3.722 | 1 | .054 | .823 | .675 | 1.003 |
| a. Variable(s) entered on step 1: MMD1, Year of ART Initiation, Reg_Sta1. | | | | | | | | | | |

MMD = Multi-month dispensing, ART = Antiretroviral Therapy
