# Supplementary material
Source: Research Square preprint supplement (doi:10.21203/rs.3.rs-8961310/v1)
Supplement: Supplementary file 2 [file 74772a34bf32bc0e65041318.doc]

**STROBE Statement**

Checklist of items that should be included in reports of observational studies

| Section/Topic | Item No | Recommendation | Reported on Page No | Section and paragraph numbers | | |  | | | | | |
| --- | --- | --- | --- | --- | --- | --- | --- | --- | --- | --- | --- | --- |
| Title and abstract | **1** | **(a) Indicate the study’s design with a commonly used term in the title or the abstract** | **1 Line 1-2** | | **Title / Abstract, first paragraph** | | |  | | | | |
| **(b) Provide in the abstract an informative and balanced summary of what was done and what was found** | **1-2 Line 12-44** | | **Abstract** | | | |  | | | |
| Introduction | | | |  | | |  | | | | | |
| Background/rationale | **2** | **Explain the scientific background and rationale for the investigation being reported** | **2-3, Line 47-88** | **Introduction, all paragraphs.** | | |  | | | | | |
| Objectives | **3** | **State specific objectives, including any prespecified hypotheses** | **3 Line 89-95** | **Introduction last paragraphs** | | |  | | | | | |
|  |  |  |  |  | | |  | | | | | |
| Methods | | | |  | | |  | | | | | |
| Study design | **4** | **Present key elements of study design early in the paper** | **3 Line 96-101** | **Methods first paragraphs.** | | |  | | | | | |
| Setting | **5** | **Describe the setting, locations, and relevant dates, including periods of recruitment, exposure, follow-up, and data collection** | **3-4 Line 102-111** | **Methods, second paragraph** | | |  | | | | | |
| Participants | **6** | **(a) Cohort study—Give the eligibility criteria, and the sources and methods of selection of participants. Describe methods of follow-up**  **Case-control study—Give the eligibility criteria, and the sources and methods of case ascertainment and control selection. Give the rationale for the choice of cases and controls**  **Cross-sectional study—Give the eligibility criteria, and the sources and methods of selection of participants** | **4, Line 112-123** | | **Methods, fourth paragraphs.** | | |  | | | | |
| **(b) Cohort study—For matched studies, give matching criteria and number of exposed and unexposed**  **Case-control study—For matched studies, give matching criteria and the number of controls per case** | **N/A** | |  | | | |  | | | |
| Variables | **7** | **Clearly define all outcomes, exposures, predictors, potential confounders, and effect modifiers. Give diagnostic criteria, if applicable** | **4, Line 124 -138** | **Methods fourth paragraphs.** | | |  | | | | | |
| Data sources/measurement | **8******* | **For each variable of interest, give sources of data and details of methods of assessment (measurement). Describe comparability of assessment methods if there is more than one group** | **4 Line 124-138** | **Same as Above** | | |  | | | | | |
| Bias | **9** | **Describe any efforts to address potential sources of bias** | **3-4 Line 139-144** | **Methods, fifth paragraph** | | |  | | | | | |
| Study size | **10** | **Explain how the study size was arrived at** | **5 Line 145-56** | **Methods, sixth paragraph** | | |  | | | | | |
| Quantitative variables | **11** | **Explain how quantitative variables were handled in the analyses. If applicable, describe which groupings were chosen and why** | **5-6 Line Line 157 -176** | **Methods, seventh-eight paragraph** | | |  | | | | | |
| Statistical methods | **12** | **(a) Describe all statistical methods, including those used to control for confounding** | **5-6 Line 157-176** | | | **Methods, seven-eight paragraph** | | |  | | | |
| **(b) Describe any methods used to examine subgroups and interactions** | **5-6 line 157-176** | | | **Methods, eight paragraph** | | | |  | | |
| **(c) Explain how missing data were addressed** | **5-6 line 157-176** | | | **Methods, eight paragraph** | | | | |  | |
| **(d) Cohort study—If applicable, explain how loss to follow-up was addressed**  **Case-control study—If applicable, explain how matching of cases and controls was addressed**  **Cross-sectional study—If applicable, describe analytical methods taking account of sampling strategy** | **N/A** | | |  | | | | | | |
| **(e) Describe any sensitivity analyses** | **5 Line 175-176** | | | **Methods, eight paragraph** | | | | | |  |
|  |  |  |  |  | | |  | | | | | |
| Results |  |  |  |  | | |  | | | | | |
| Participants | **13*** | **(a) Report numbers of individuals at each stage of study—eg numbers potentially eligible, examined for eligibility, confirmed eligible, included in the study, completing follow-up, and analysed** | **6 Line 177-187**  **Figure 1** | **Results, first paragraph** | | |  | | | | | |
|  |  | **(b) Give reasons for non-participation at each stage** | **6, Line 184-187 Figure 1** | Results, first paragraph | | |  | | | | | |
|  |  | **(c) Consider use of a flow diagram** | **Figure 1** | **Included** | | |  | | | | | |
| Descriptive data | **14*** | **(a) Give characteristics of study participants (eg demographic, clinical, social) and information on exposures and potential confounders** | **6, Line 188-201 Table 1** | **Results second paragraph** | | |  | | | | | |
|  |  | **(b) Indicate number of participants with missing data for each variable of interest** | **Table 1** | **Results, second paragraph** | | |  | | | | | |
|  |  | **(c) Cohort study—Summarise follow-up time (eg, average and total amount)** | **N/A** |  | | |  | | | | | |
| Outcome data | **15*** | **Cohort study—Report numbers of outcome events or summary measures over time** | **6-7, Line 202-238 Table 1** | **Results, third paragraph** | | |  | | | | | |
|  |  | **Case-control study—Report numbers in each exposure category, or summary measures of exposure** | **N/A** |  | | |  | | | | | |
|  |  | **Cross-sectional study—Report numbers of outcome events or summary measures** | **N/A** |  | | |  | | | | | |
| Main results | **16** | **(a) Give unadjusted estimates and, if applicable, confounder-adjusted estimates and their precision (eg, 95% confidence interval). Make clear which confounders were adjusted for and why they were included** | **6-7, Table 2,** | **Results, third - fifth paragraph** | | |  | | | | | |
|  |  | **(b) Report category boundaries when continuous variables were categorized** | **N/A** |  | | |  | | | | | |
|  |  | **(c) If relevant, consider translating estimates of relative risk into absolute risk for a meaningful time period** | **N/A** |  | | |  | | | | | |
| Other analyses | **17** | **Report other analyses done—eg analyses of subgroups and interactions, and sensitivity analyses** | **6-7 Table 2, Figure 2, Table 3** | **Results, fourth and fifth paragraph** | | |  | | | | | |
|  |  |  |  |  | | |  | | | | | |
| Discussion |  |  |  |  | | |  | | | | | |
| Key results | **18** | **Summarise key results with reference to study objectives** | **7-8 Line 240-249** | **Discussion, first - second paragraph** | | |  | | | | | |
| Limitations | 19 | Discuss limitations of the study, taking into account sources of potential bias or imprecision. Discuss both direction and magnitude of any potential bias | 8-9 Line 279-298 | Discussion, sixth – seventh paragraph | | |  | | | | | |
| Interpretation | **20** | **Give a cautious overall interpretation of results considering objectives, limitations, multiplicity of analyses, results from similar studies, and other relevant evidence** | **8 Line 250-278** | **Discussion, third to fifth paragraph** | | |  | | | | | |
| Generalisability | **21** | **Discuss the generalisability (external validity) of the study results** | **9 line 299 - 304** | **Discussion, eight paragraph** | | |  | | | | | |
| Other Information |  |  |  |  | | |  | | | | | |
| Funding | **22** | **Give the source of funding and the role of the funders for the present study and, if applicable, for the original study on which the present article is based** | **10 Line 338-344** | **Funding paragraph** | | |  | | | | | |

**Give information separately for cases and controls in case-control studies and, if applicable, for exposed and unexposed groups in cohort and cross-sectional studies.*
